# Supplementary material for: Prdx6-induced inhibition of ferroptosis in epithelial cells contributes to liquiritin-exerted alleviation of colitis
Source: Royal Society of Chemistry journal article supplement (doi:10.1039/d2fo00945e), 2022-01-01
Supplement: d2fo00945e2.pdf [file d2fo00945e2.pdf]

Representative data :

Prdx6

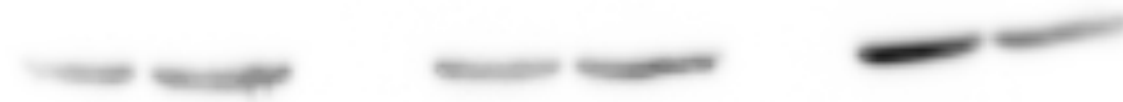

GAPDH

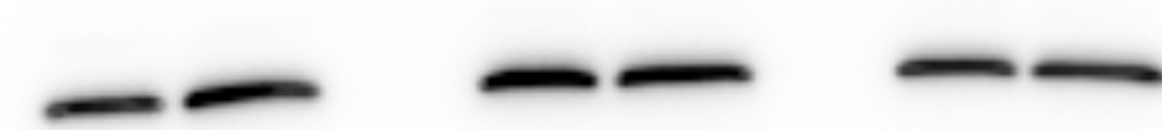

Si-ctrl

-

-

-

-

+

-

Si-Prdx6

+

+

+

+

-

+

Replicates:

Prdx6

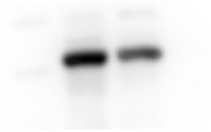

GAPDH

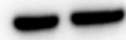

Si-ctrl

+ -

Si-Prdx6

- +

Prdx6

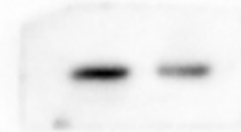

GAPDH

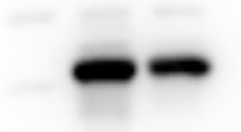

Si-ctrl

+ -

Si-Prdx6

- +
