# Supplementary material for: Prdx6-induced inhibition of ferroptosis in epithelial cells contributes to liquiritin-exerted alleviation of colitis
Source: Royal Society of Chemistry journal article supplement (doi:10.1039/d2fo00945e), 2022-01-01

# Statistical Graph

# 1. Statistical graph of IHC in Fig 4

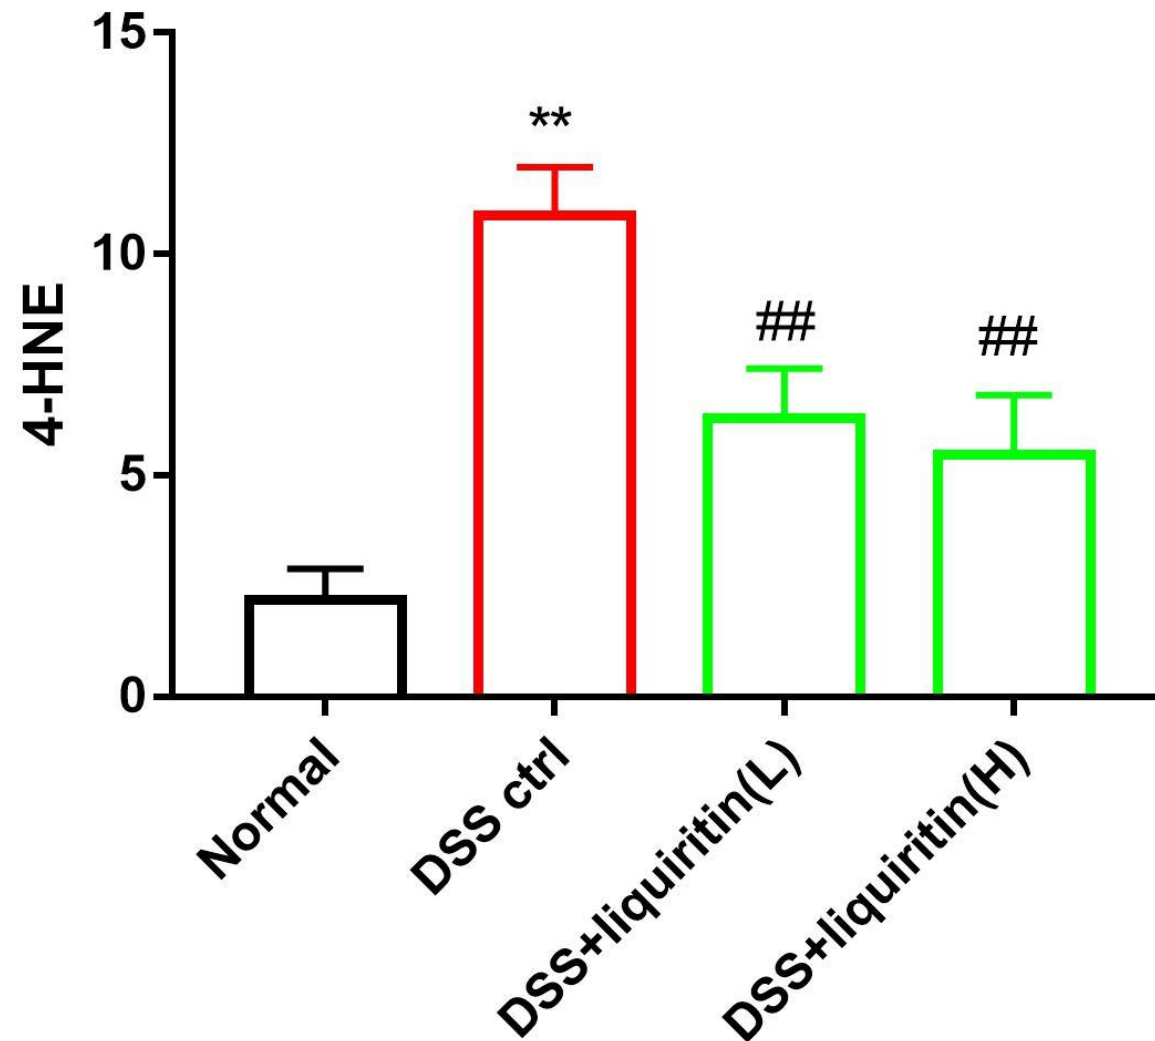

## 2. Statistical graph of HE staining in Fig 5

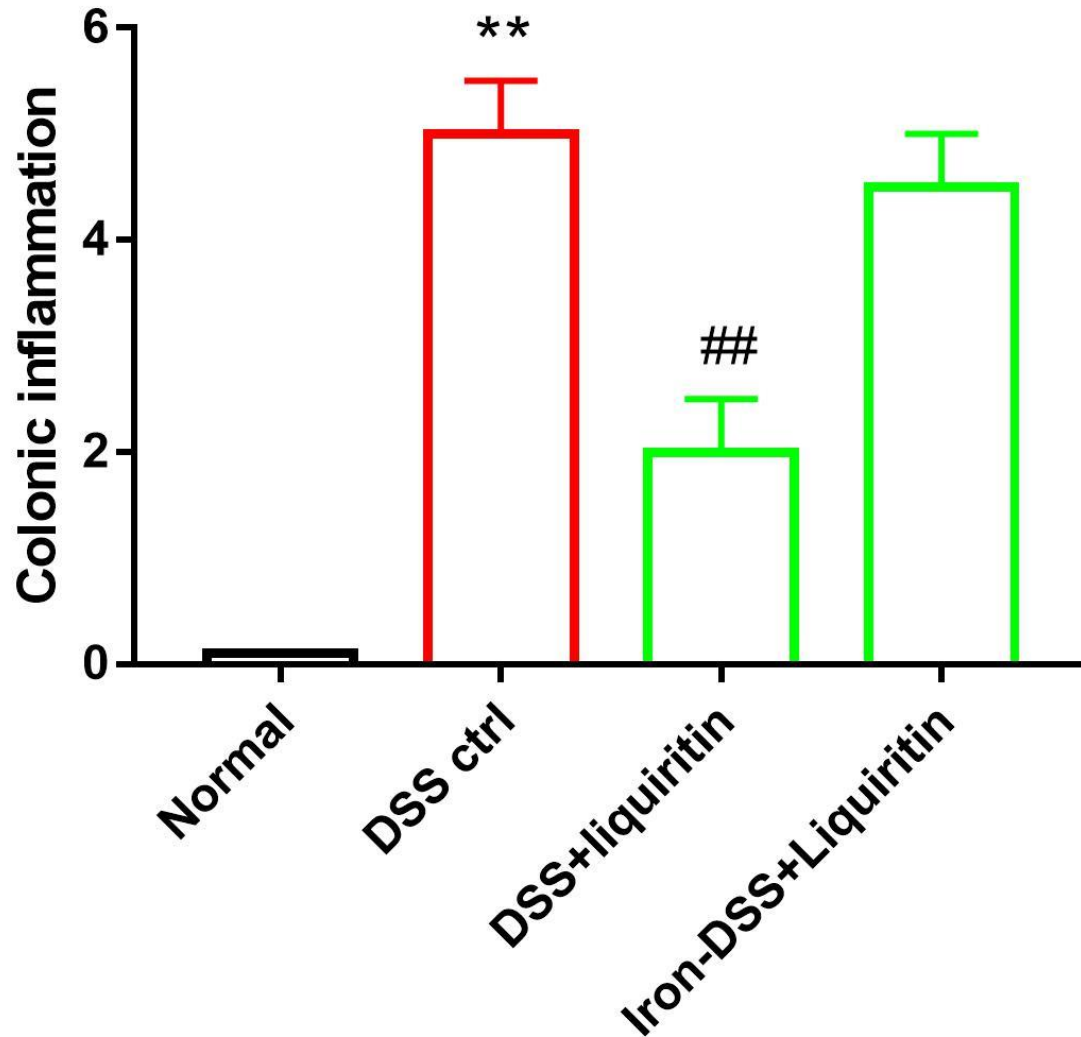

### 3. Statistical graph of IHC in Fig 6

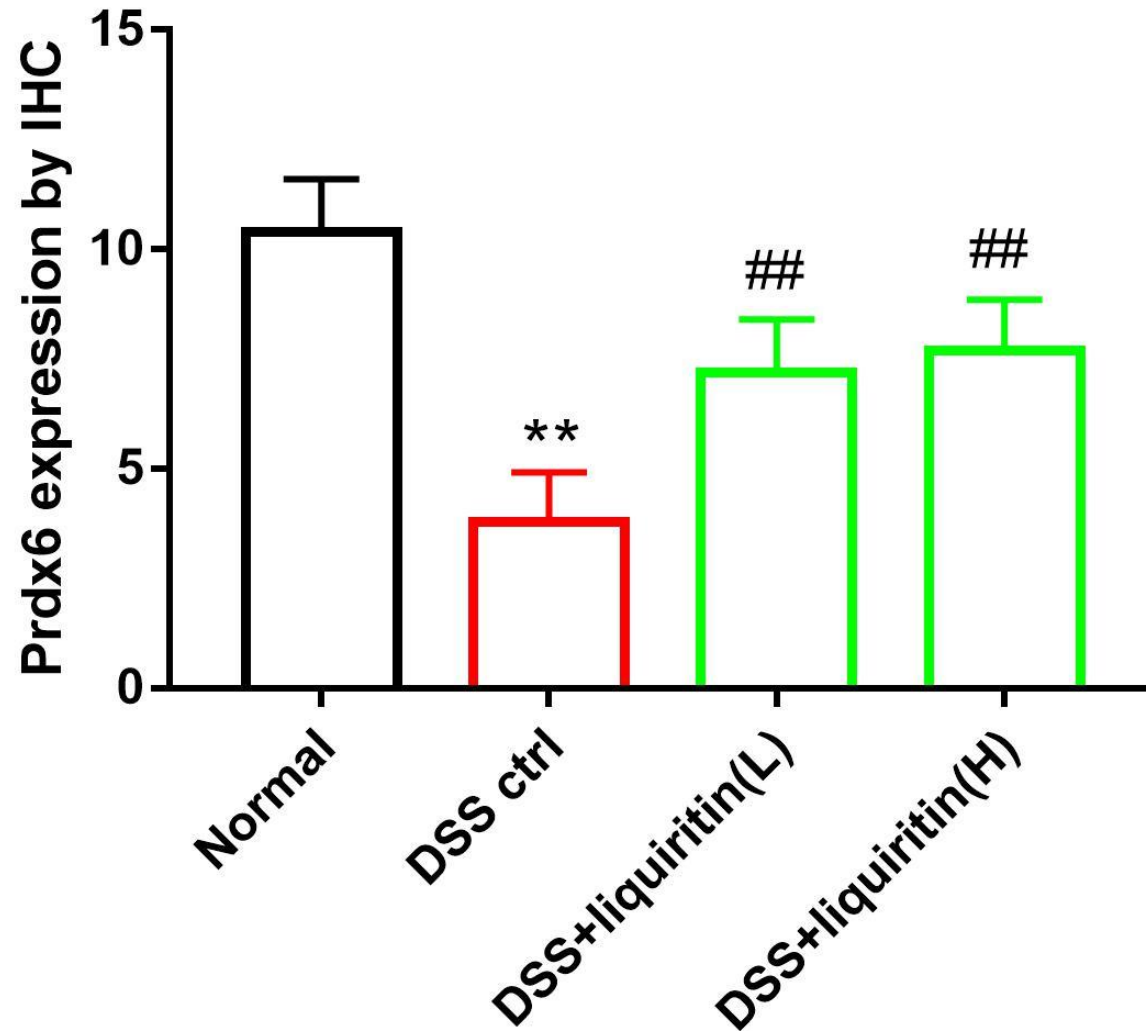

# 4. Statistical graph of WB in Fig 6

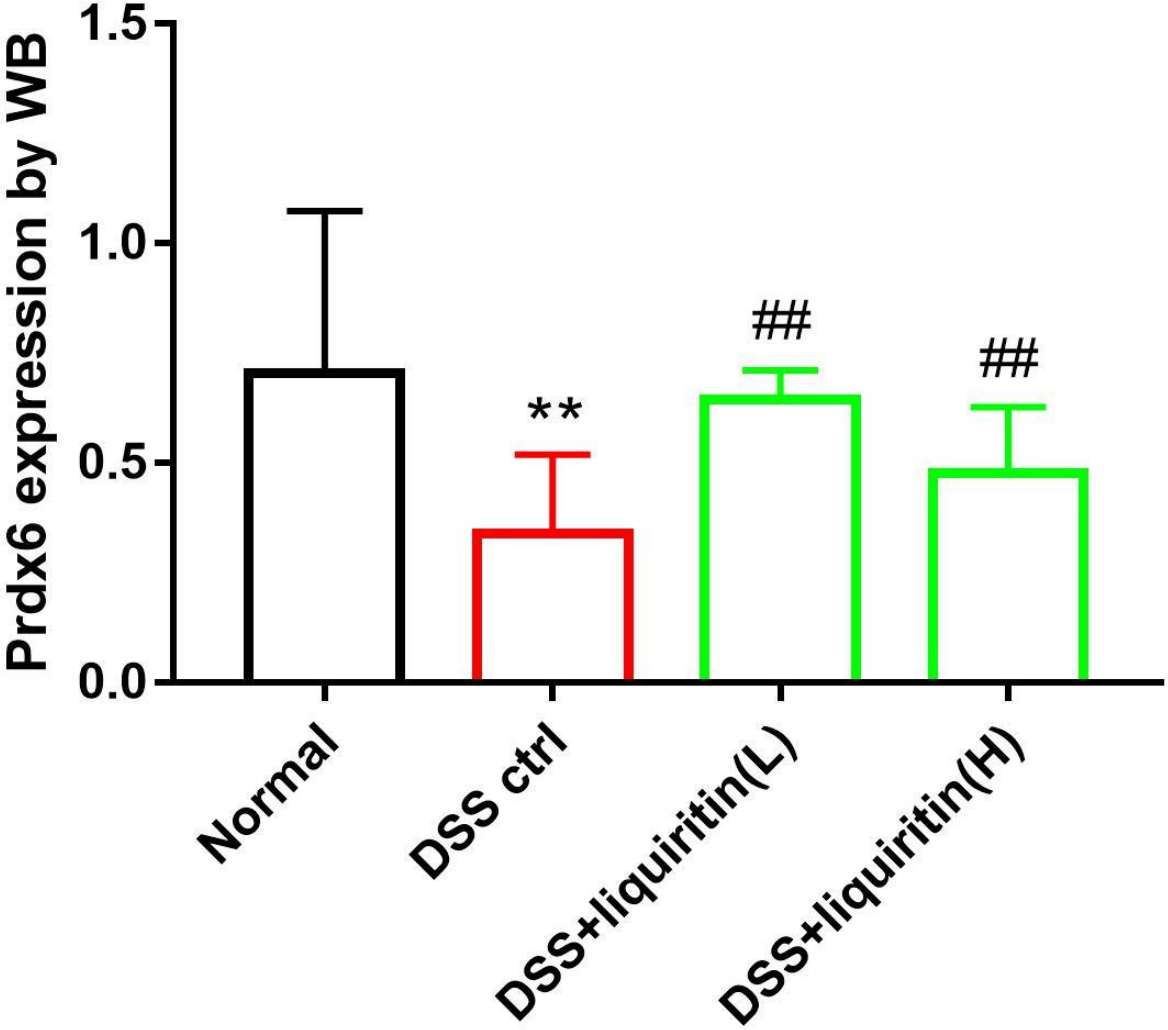

## 5. Statistical graph of WB in Fig 7

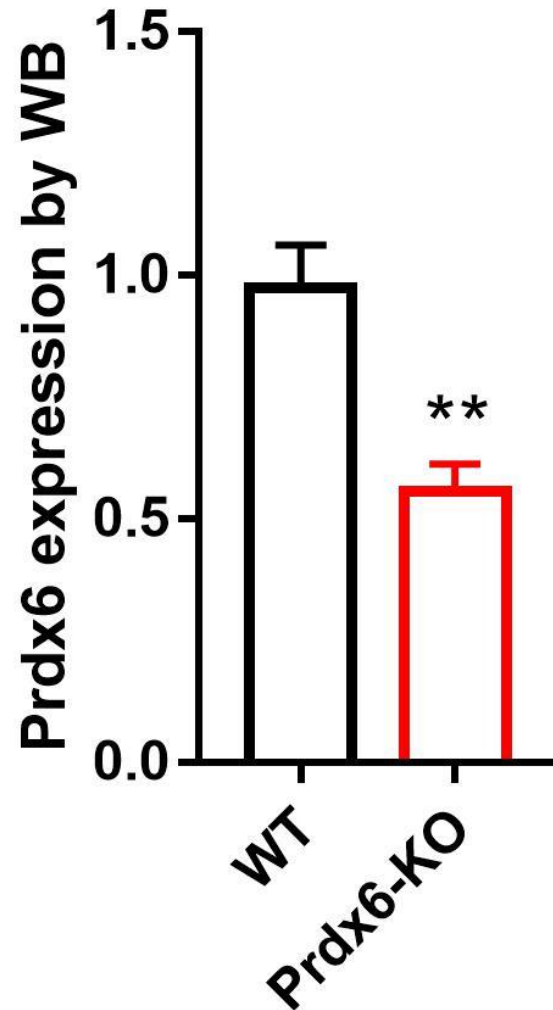

Supplement: d2fo00945e4.pdf [file d2fo00945e4.pdf]
