# Supplementary figures and images for: Prdx6-induced inhibition of ferroptosis in epithelial cells contributes to liquiritin-exerted alleviation of colitis
Source: Royal Society of Chemistry journal article supplement (doi:10.1039/d2fo00945e), 2022-01-01

## Represent data:

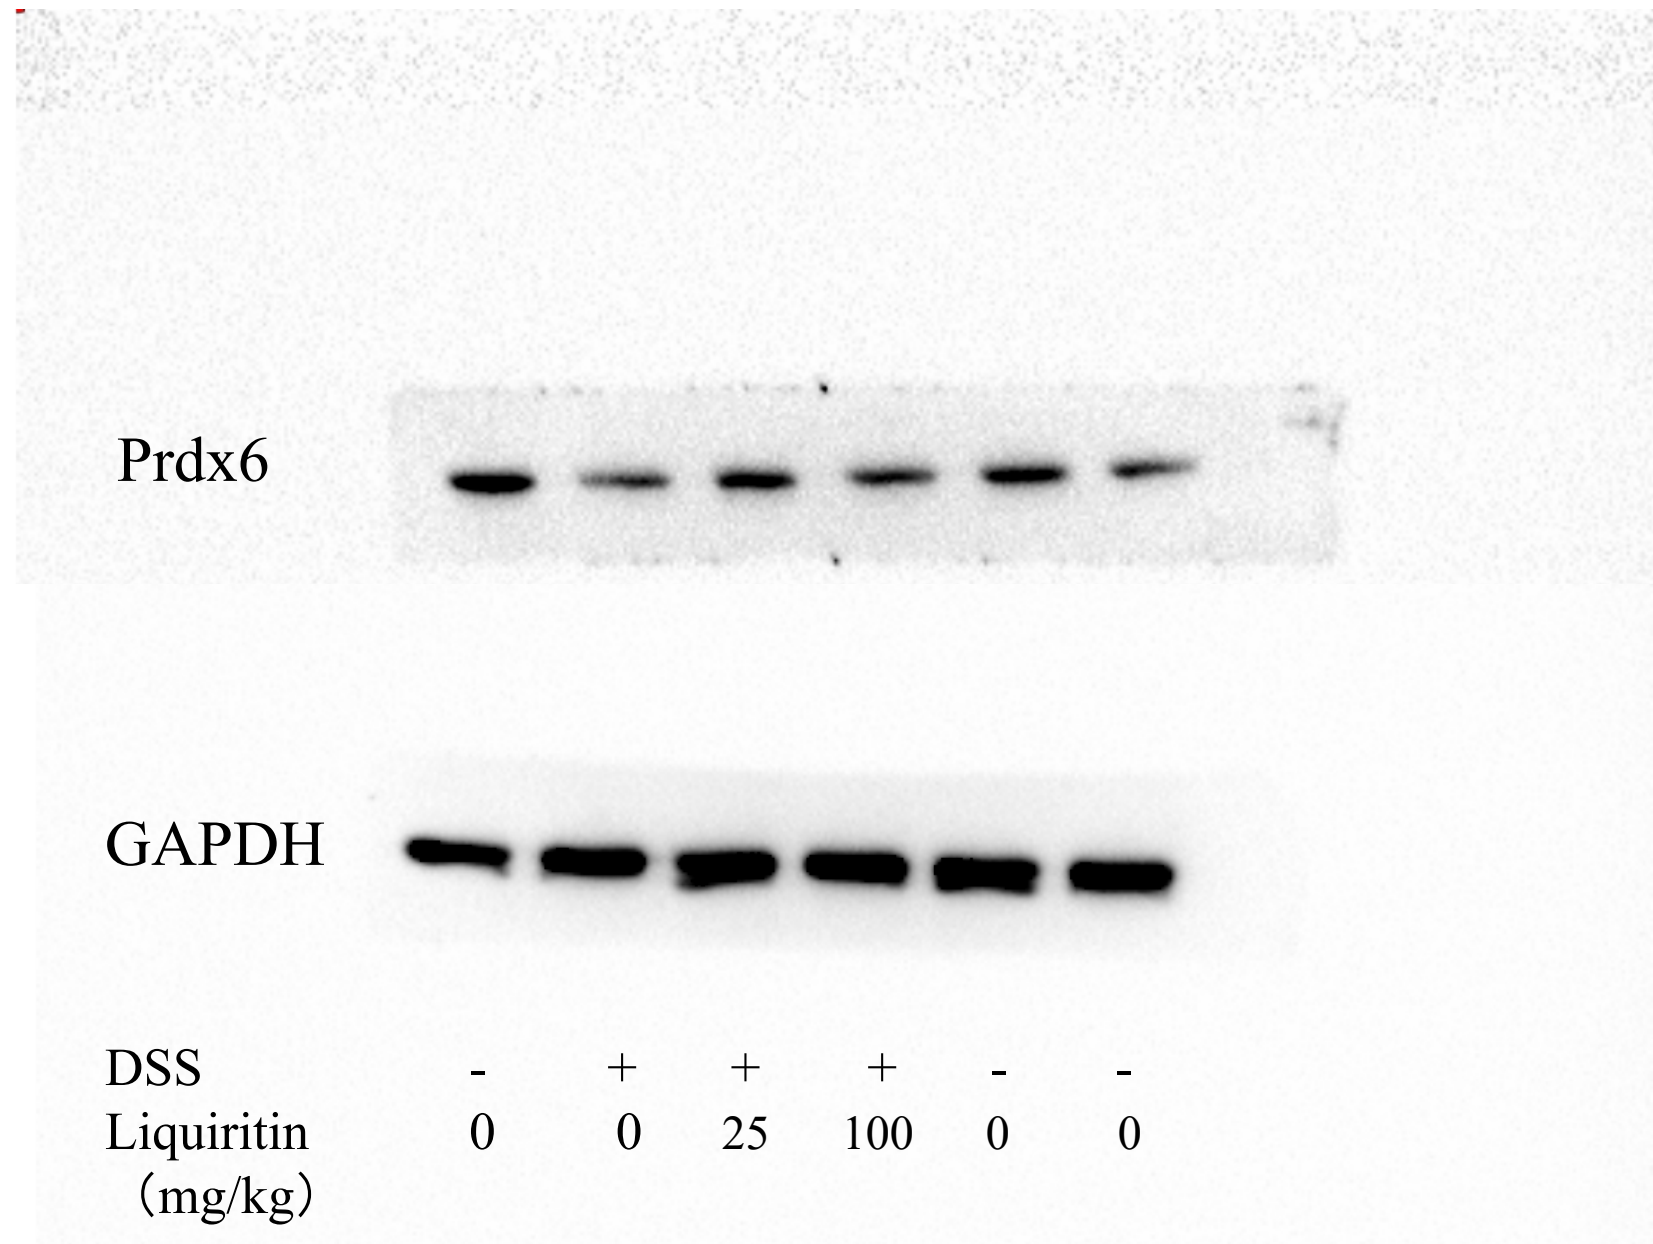

# Replicates :

Prdx6

GAPDH

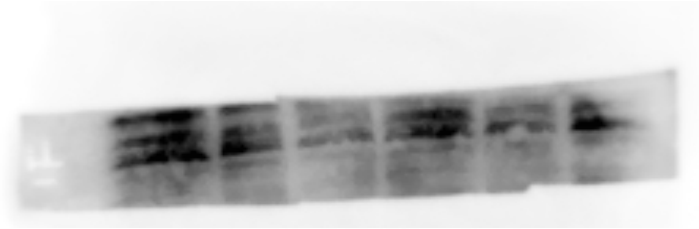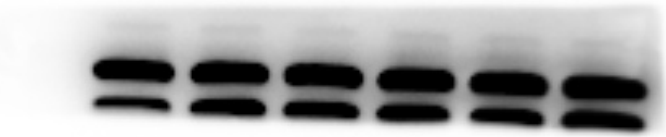

|                         |   |   |   |    |     |     |
|-------------------------|---|---|---|----|-----|-----|
| DSS :                   | - | - | + | +  | +   | +   |
| Liquiritin :<br>(mg/kg) | 0 | 0 | 0 | 25 | 100 | 100 |

Prdx6

GAPDH

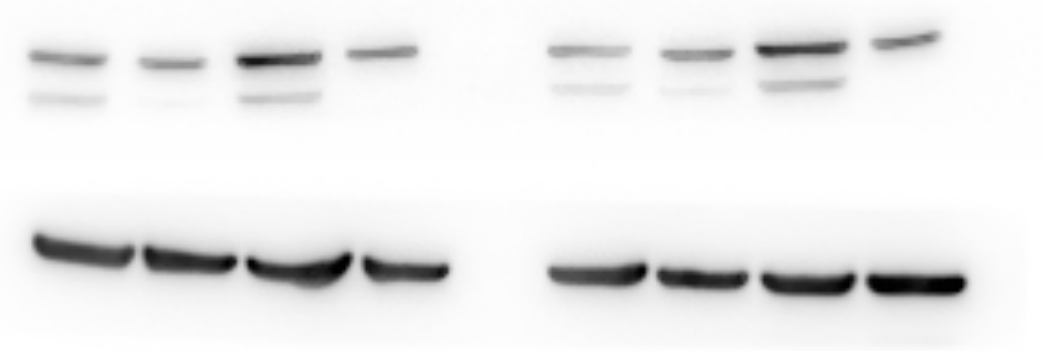

|                        |   |   |    |     |   |   |    |     |
|------------------------|---|---|----|-----|---|---|----|-----|
| DSS :                  | - | + | -  | -   | - | + | -  | -   |
| Liquiritin:<br>(mg/kg) | 0 | 0 | 25 | 100 | 0 | 0 | 25 | 100 |

Supplement: d2fo00945e1.pdf [file d2fo00945e1.pdf]

Sham

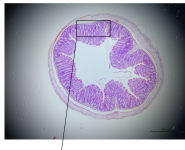

Liquiritin(L)

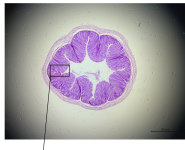

Liquiritin(H)

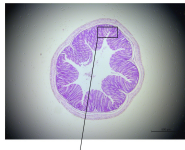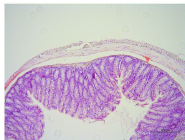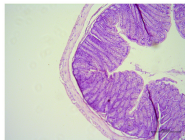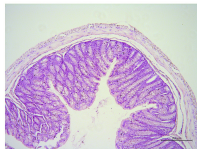

Supplement: d2fo00945e3.pdf [file d2fo00945e3.pdf]
